# Supplementary material
Source: MDPI journal article supplement (https://www.mdpi.com/2311-7524/7/12/590)
Supplement: s1 [file s1]

## Article

# Supplementary Materials: Effects of Individual and Simultaneous Selenium and Iodine Biofortification of Baby-Leaf Lettuce Plants Grown in Two Different Hydroponic Systems

Martina Puccinelli, Fernando Malorgio, Luca Incrocci, Irene Rosellini and Beatrice Pezzarossa

**Table S1.** Environmental parameters registered during the first experiment.

|                                                                    |                    |
|--------------------------------------------------------------------|--------------------|
| Lettuce sowing date                                                | September 17, 2019 |
| Transplant date                                                    | October 1, 2019    |
| Start of treatment                                                 | October 8, 2019    |
| Harvest date                                                       | October 18, 2019   |
| Days of treatment                                                  | 10                 |
| Mean air temperature (°C)                                          | 22.0               |
| Mean air relative humidity (%)                                     | 72.4               |
| Mean daily solar radiation (MJ m <sup>-2</sup> day <sup>-1</sup> ) | 5.44               |
| Cumulative solar radiation (MJ m <sup>-2</sup> )                   | 95.8               |

**Table S2.** Environmental parameters registered during the second experiment.

|                                                                    |                    |
|--------------------------------------------------------------------|--------------------|
| Lettuce sowing date                                                | September 24, 2020 |
| Transplant date                                                    | October 8, 2020    |
| Start of treatment                                                 | October 15, 2020   |
| Harvest date                                                       | October 25, 2020   |
| Days of treatment                                                  | 10                 |
| Mean air temperature (°C)                                          | 20.0               |
| Mean air relative humidity (%)                                     | 75.7               |
| Mean daily solar radiation (MJ m <sup>-2</sup> day <sup>-1</sup> ) | 4.83               |
| Cumulative solar radiation (MJ m <sup>-2</sup> )                   | 86.9               |

**Table S3.** Total phenols, antioxidant capacity (FRAP), total chlorophyll, carotenoid contents, measured at harvest, in leaves of lettuce plants grown in two different hydroponic systems (HS), floating (FS) and aeroponics (AE), and at different concentrations of I and Se in the nutrient solution, in the first experiment.

| Hydroponic system | I added (μM) | Se added (μM) | Total phenols (mg GAE g <sup>-1</sup> DW) | FRAP (μmol Fe (II) g <sup>-1</sup> FW) | Chls tot (mg g <sup>-1</sup> DW) | Car (mg g <sup>-1</sup> DW) | NO <sub>3</sub> <sup>-</sup> (mg g <sup>-1</sup> DW) |
|-------------------|--------------|---------------|-------------------------------------------|----------------------------------------|----------------------------------|-----------------------------|------------------------------------------------------|
| FS                | 0            | 0             | 126.9                                     | 602.8                                  | 18.1                             | 3.0                         | 25.9                                                 |
|                   |              | 13            | 111.6                                     | 513.6                                  | 16.6                             | 3.4                         | 28.5                                                 |
|                   | 5            | 0             | 108.8                                     | 534.6                                  | 16.4                             | 3.0                         | 26.7                                                 |
|                   |              | 13            | 166.7                                     | 683.3                                  | 22.8                             | 4.2                         | 25.8                                                 |
| A                 | 0            | 0             | 123.8                                     | 618.1                                  | 20.6                             | 4.6                         | 29.0                                                 |
|                   |              | 13            | 142.6                                     | 788.6                                  | 22.5                             | 4.9                         | 17.6                                                 |
|                   | 5            | 0             | 133.7                                     | 771.3                                  | 19.6                             | 4.5                         | 37.7                                                 |
|                   |              | 13            | 136.5                                     | 660.6                                  | 26.3                             | 5.7                         | 18.5                                                 |
| Mean effect       |              |               |                                           |                                        |                                  |                             |                                                      |
| FS                |              |               | 128.5                                     | 583.6                                  | 18.5 b                           | 3.4 b                       | 26.7                                                 |
| AE                |              |               | 134.1                                     | 709.6                                  | 22.2 a                           | 4.9 a                       | 25.7                                                 |
|                   | 0            |               | 127.6                                     | 645.3                                  | 19.9                             | 4.2                         | 24.9                                                 |
|                   | 5            |               | 136.2                                     | 673.2                                  | 21.6                             | 4.5                         | 27.3                                                 |
|                   |              | 0             | 124.4                                     | 644.3                                  | 19.0 b                           | 4.0 b                       | 30.5 a                                               |
|                   |              | 13            | 139.4                                     | 674.1                                  | 22.5 a                           | 4.7 a                       | 21.7 b                                               |
| FS                | 0            |               | 119.2                                     | 558.2                                  | 17.3                             | 3.2                         | 27.2 a                                               |
|                   | 5            |               | 137.8                                     | 609.0                                  | 19.6                             | 3.6                         | 26.2 ab                                              |
| AE                | 0            |               | 133.2                                     | 703.3                                  | 21.6                             | 4.8                         | 23.3 b                                               |
|                   | 5            |               | 135.1                                     | 715.9                                  | 22.9                             | 5.1                         | 28.1 a                                               |
| FS                |              | 0             | 117.8                                     | 568.7                                  | 17.2                             | 3.0                         | 26.3 b                                               |
|                   |              | 13            | 139.2                                     | 598.4                                  | 19.7                             | 3.8                         | 27.1 b                                               |
| AE                |              | 0             | 128.7                                     | 694.7                                  | 20.1                             | 4.6                         | 33.3 a                                               |
|                   |              | 13            | 139.6                                     | 724.6                                  | 24.4                             | 5.3                         | 18.0 c                                               |
|                   | 0            | 0             | 125.0                                     | 612.0                                  | 19.6 b                           | 4.0                         | 27.8 ab                                              |
|                   |              | 13            | 130.2                                     | 678.6                                  | 20.1 ab                          | 4.3                         | 21.9 b                                               |
|                   | 5            | 0             | 123.7                                     | 676.6                                  | 18.3 b                           | 3.9                         | 33.3 a                                               |
|                   |              | 13            | 148.6                                     | 669.7                                  | 24.9 a                           | 5.1                         | 21.4 b                                               |
| Significance      |              |               |                                           |                                        |                                  |                             |                                                      |
|                   | HS           |               | ns                                        | ns                                     | *                                | ***                         | ns                                                   |
|                   | I            |               | ns                                        | ns                                     | ns                               | ns                          | ns                                                   |
|                   | Se           |               | ns                                        | ns                                     | *                                | *                           | *                                                    |
|                   | HS × I       |               | ns                                        | ns                                     | ns                               | ns                          | ***                                                  |
|                   | HS × Se      |               | ns                                        | ns                                     | ns                               | ns                          | *                                                    |
|                   | I × Se       |               | ns                                        | ns                                     | *                                | ns                          | **                                                   |
|                   | HS × I × Se  |               | ns                                        | ns                                     | ns                               | ns                          | ns                                                   |

Means ( $n = 3$ ) flanked by the same letter are not statistically different for  $p = 0.05$  after Duncan's test. Significance level: \*\*\*  $p \leq 0.001$ ; \*\*  $p \leq 0.01$ ; \*  $p \leq 0.05$ ; ns = not significant.

**Table S4.** Total phenol, flavonoid content, antioxidant capacity (FRAP), total chlorophyll and carotenoid contents, measured at harvest, in leaves of lettuce plants grown in two different hydroponic systems (HS), floating (FS) and aeroponics (AE), and at different concentrations of I and Se in the nutrient solution, in the second experiment.

| Hydroponic system | I added (μM) | Se added (μM) | Total phenols (mg GAE g <sup>-1</sup> DW) | Flavonoids (mg catechin g <sup>-1</sup> DW) | FRAP (μmol Fe (II) g <sup>-1</sup> DW) | Chls tot (mg g <sup>-1</sup> DW) | Car (mg g <sup>-1</sup> DW) | NO <sub>3</sub> <sup>-</sup> (mg g <sup>-1</sup> DW) |
|-------------------|--------------|---------------|-------------------------------------------|---------------------------------------------|----------------------------------------|----------------------------------|-----------------------------|------------------------------------------------------|
| FS                | 0            | 0             | 76.6                                      | 31.8                                        | 680.6                                  | 27.8                             | 5.1                         | 22.9                                                 |
|                   |              | 13            | 75.3                                      | 35.9                                        | 764.8                                  | 26.6                             | 4.1                         | 24.4                                                 |
|                   | 5            | 0             | 74.7                                      | 35.0                                        | 687.8                                  | 26.8                             | 4.4                         | 19.6                                                 |
|                   |              | 13            | 74.8                                      | 32.0                                        | 754.1                                  | 27.2                             | 4.7                         | 22.5                                                 |
| A                 | 0            | 0             | 73.6                                      | 29.8                                        | 695.3                                  | 21.4                             | 4.1                         | 20.4                                                 |
|                   |              | 13            | 64.8                                      | 23.9                                        | 627.5                                  | 26.0                             | 4.5                         | 15.1                                                 |
|                   | 5            | 0             | 65.0                                      | 26.1                                        | 576.6                                  | 22.4                             | 4.2                         | 21.0                                                 |
|                   |              | 13            | 73.4                                      | 31.5                                        | 705.4                                  | 24.3                             | 4.3                         | 17.9                                                 |
| Mean effect       |              |               |                                           |                                             |                                        |                                  |                             |                                                      |
| FS                |              |               | 75.3                                      | 33.7                                        | 721.8                                  | 27.1                             | 4.6                         | 22.4 a                                               |
| AE                |              |               | 69.2                                      | 27.8                                        | 651.2                                  | 23.5                             | 4.3                         | 18.6 b                                               |
|                   | 0            |               | 72.6                                      | 30.3                                        | 692.0                                  | 25.4                             | 4.5                         | 20.1                                                 |
|                   | 5            |               | 72.0                                      | 31.2                                        | 681.0                                  | 25.2                             | 4.4                         | 20.1                                                 |
|                   |              | 0             | 72.5                                      | 30.7                                        | 660.1                                  | 24.6                             | 4.5                         | 20.9                                                 |
|                   |              | 13            | 72.1                                      | 30.8                                        | 712.9                                  | 26.0                             | 4.4                         | 19.3                                                 |
| FS                | 0            |               | 76.0                                      | 33.8                                        | 722.7                                  | 27.2                             | 4.6                         | 17.8                                                 |
|                   | 5            |               | 74.7                                      | 33.5                                        | 720.9                                  | 27.0                             | 4.5                         | 19.5                                                 |
| AE                | 0            |               | 69.2                                      | 26.8                                        | 661.4                                  | 23.7                             | 4.3                         | 23.7                                                 |
|                   | 5            |               | 69.2                                      | 28.8                                        | 641.0                                  | 23.4                             | 4.2                         | 21.1                                                 |
| FS                |              | 0             | 75.6                                      | 33.4                                        | 684.2                                  | 27.3                             | 4.8                         | 21.3 a                                               |
|                   |              | 13            | 75.0                                      | 34.0                                        | 759.5                                  | 26.9                             | 4.4                         | 23.5 a                                               |
| AE                |              | 0             | 69.3                                      | 27.9                                        | 635.9                                  | 21.9                             | 4.2                         | 20.7 a                                               |
|                   |              | 13            | 69.1                                      | 27.7                                        | 666.4                                  | 25.2                             | 4.4                         | 16.5 b                                               |
|                   | 0            | 0             | 75.1                                      | 30.8                                        | 687.9                                  | 24.6                             | 4.6                         | 21.4                                                 |
|                   |              | 13            | 70.0                                      | 29.9                                        | 696.1                                  | 26.3                             | 4.3                         | 18.8                                                 |
|                   | 5            | 0             | 69.8                                      | 30.6                                        | 632.2                                  | 24.6                             | 4.3                         | 20.5                                                 |
|                   |              | 13            | 74.1                                      | 31.8                                        | 729.8                                  | 25.8                             | 4.5                         | 19.7                                                 |
| Significance      |              |               |                                           |                                             |                                        |                                  |                             |                                                      |
|                   | HS           |               | *                                         | ns                                          | ns                                     | ns                               | ns                          | **                                                   |
|                   | I            |               | ns                                        | ns                                          | ns                                     | ns                               | ns                          | ns                                                   |
|                   | Se           |               | ns                                        | ns                                          | ns                                     | ns                               | ns                          | ns                                                   |
|                   | HS × I       |               | ns                                        | ns                                          | ns                                     | ns                               | ns                          | ns                                                   |
|                   | HS × Se      |               | ns                                        | ns                                          | ns                                     | ns                               | ns                          | **                                                   |
|                   | I × Se       |               | ns                                        | ns                                          | ns                                     | ns                               | ns                          | ns                                                   |
|                   | HS × I × Se  |               | ns                                        | ns                                          | ns                                     | ns                               | ns                          | ns                                                   |

Means ( $n = 3$ ) flanked by the same letter are not statistically different for  $p = 0.05$  after Duncan's test. Significance level: \*\*\*  $p \leq 0.001$ ; \*\*  $p \leq 0.01$ ; \*  $p \leq 0.05$ ; ns = not significant.

**Table S5.** Se estimated daily intake ( $EDI_{Se}$ ), Se estimated dietary intake expressed as percentage of the Se adequate intake ( $EDI_{Se}/AI$ ), and health risk index (HRI) of a serving (100 g) of lettuce grown in two different hydroponic systems with different concentrations of I and Se in the nutrient solution.

| Hydroponic system | I added ( $\mu M$ ) | Se added ( $\mu M$ ) | $EDI_{Se}$<br>( $\mu g \text{ day}^{-1}$ ) |                     | $EDI_{Se}/AI$<br>(%) |                     | $HRI_{Se}$          |                     |
|-------------------|---------------------|----------------------|--------------------------------------------|---------------------|----------------------|---------------------|---------------------|---------------------|
|                   |                     |                      | 1 <sup>st</sup> exp                        | 2 <sup>nd</sup> exp | 1 <sup>st</sup> exp  | 2 <sup>nd</sup> exp | 1 <sup>st</sup> exp | 2 <sup>nd</sup> exp |
| FS                | 0                   | 0                    | 0.3                                        | 0.0                 | 0.4                  | 0.0                 | 0.00                | 0.00                |
|                   |                     | 13                   | 13.3                                       | 19.0                | 19.0                 | 27.2                | 0.04                | 0.06                |
|                   | 5                   | 0                    | 0.1                                        | 0.0                 | 0.2                  | 0.0                 | 0.00                | 0.00                |
|                   |                     | 13                   | 9.9                                        | 15.8                | 14.2                 | 22.6                | 0.03                | 0.05                |
| A                 | 0                   | 0                    | 0.3                                        | 0.0                 | 0.5                  | 0.0                 | 0.00                | 0.00                |
|                   |                     | 13                   | 18.6                                       | 19.2                | 26.6                 | 27.4                | 0.06                | 0.06                |
|                   | 5                   | 0                    | 0.5                                        | 0.0                 | 0.7                  | 0.0                 | 0.00                | 0.00                |
|                   |                     | 13                   | 21.0                                       | 20.5                | 29.9                 | 29.4                | 0.07                | 0.07                |

**Table S6.** I estimated daily intake ( $EDI_I$ ), Se estimated dietary intake expressed as percentage of the Se adequate intake ( $EDI_I/AI$ ), and health risk index (HRI) of a serving (100 g) of lettuce grown in two different hydroponic systems with different concentrations of I and Se in the nutrient solution.

| Hydroponic system | I added ( $\mu M$ ) | Se added ( $\mu M$ ) | $EDI_I$<br>( $\mu g \text{ day}^{-1}$ ) |                     | $EDI_I/AI$<br>(%)   |                     | $HRI_I$             |                     |
|-------------------|---------------------|----------------------|-----------------------------------------|---------------------|---------------------|---------------------|---------------------|---------------------|
|                   |                     |                      | 1 <sup>st</sup> exp                     | 2 <sup>nd</sup> exp | 1 <sup>st</sup> exp | 2 <sup>nd</sup> exp | 1 <sup>st</sup> exp | 2 <sup>nd</sup> exp |
| FS                | 0                   | 0                    | 16.5                                    | 24.5                | 11.0                | 16.4                | 0.03                | 0.041               |
|                   |                     | 13                   | 9.7                                     | 15.8                | 6.5                 | 10.5                | 0.02                | 0.026               |
|                   | 5                   | 0                    | 344.7                                   | 569.1               | 229.8               | 379.4               | 0.57                | 0.949               |
|                   |                     | 13                   | 210.8                                   | 518.0               | 140.5               | 345.3               | 0.35                | 0.863               |
| A                 | 0                   | 0                    | 14.0                                    | 16.4                | 9.3                 | 11.0                | 0.02                | 0.027               |
|                   |                     | 13                   | 7.0                                     | 14.4                | 4.6                 | 9.6                 | 0.01                | 0.024               |
|                   | 5                   | 0                    | 214.2                                   | 405.8               | 142.8               | 270.5               | 0.36                | 0.676               |
|                   |                     | 13                   | 236.3                                   | 482.0               | 157.5               | 321.3               | 0.39                | 0.803               |

**Table S7.** Weight reduction, total phenol, flavonoid content, antioxidant capacity (FRAP), chlorophyll a to b ratio (chl a/chl b), total chlorophyll and carotenoid contents, measured after 2 days of storage, in leaves of lettuce grown in two different hydroponic systems with different concentrations of I and Se in the nutrient solution.

| Hydroponic system | I added (μM) | Se added (μM) | Weight reduction (%) | Total phenols (mg GAE g <sup>-1</sup> FW) | Flavonoids (mg catechin g <sup>-1</sup> FW) | FRAP (μmol Fe(II) g <sup>-1</sup> FW) | chl a/chl b (mg g <sup>-1</sup> FW) | Chls tot (mg g <sup>-1</sup> FW) | Car (mg g <sup>-1</sup> FW) |
|-------------------|--------------|---------------|----------------------|-------------------------------------------|---------------------------------------------|---------------------------------------|-------------------------------------|----------------------------------|-----------------------------|
| FS                | 0            | 0             | 5.00                 | 3.02                                      | 1.29                                        | 27.3                                  | 2.68                                | 912.4                            | 173.2                       |
|                   |              | 13            | 5.30                 | 3.22                                      | 1.31                                        | 32.0                                  | 3.85                                | 954.2                            | 167.1                       |
|                   | 5            | 0             | 4.10                 | 3.09                                      | 1.49                                        | 28.5                                  | 2.81                                | 951.9                            | 187.1                       |
|                   |              | 13            | 4.13                 | 3.17                                      | 1.60                                        | 31.2                                  | 4.21                                | 945.8                            | 176.4                       |
| A                 | 0            | 0             | 3.77                 | 3.15                                      | 1.37                                        | 29.0                                  | 2.42                                | 851.8                            | 158.2                       |
|                   |              | 13            | 2.83                 | 3.04                                      | 1.27                                        | 27.3                                  | 2.77                                | 937.6                            | 151.9                       |
|                   | 5            | 0             | 3.73                 | 3.14                                      | 1.39                                        | 29.5                                  | 2.58                                | 932.0                            | 166.1                       |
|                   |              | 13            | 3.97                 | 3.19                                      | 1.37                                        | 30.4                                  | 2.84                                | 920.9                            | 159.8                       |
| FS                |              |               | 4.63 a               | 3.13                                      | 1.42                                        | 29.7                                  | 3.39 a                              | 941.1                            | 176.0                       |
| AE                |              |               | 3.58 b               | 3.13                                      | 1.35                                        | 29.1                                  | 2.65 b                              | 910.6                            | 159.0                       |
| 0 μM I            |              |               | 4.23                 | 3.11                                      | 1.31                                        | 28.9                                  | 2.93                                | 914.0                            | 162.6                       |
| 5 μM I            |              |               | 3.98                 | 3.15                                      | 1.46                                        | 29.9                                  | 3.11                                | 937.7                            | 172.3                       |
| 0 μM Se           |              |               | 4.15                 | 3.10                                      | 1.38                                        | 28.6                                  | 2.62 b                              | 912.0                            | 171.1                       |
| 13 μM Se          |              |               | 4.06                 | 3.16                                      | 1.39                                        | 30.2                                  | 3.41 a                              | 939.6                            | 163.8                       |
| FS                | 0 μM I       |               | 5.15                 | 3.12                                      | 1.30                                        | 29.7                                  | 3.26                                | 933.3                            | 170.2                       |
|                   | 5 μM I       |               | 4.12                 | 3.13                                      | 1.54                                        | 29.8                                  | 3.51                                | 948.8                            | 181.7                       |
| AE                | 0 μM I       |               | 3.30                 | 3.09                                      | 1.32                                        | 28.1                                  | 2.60                                | 894.7                            | 155.0                       |
|                   | 5 μM I       |               | 3.85                 | 3.16                                      | 1.38                                        | 30.0                                  | 2.71                                | 926.5                            | 162.9                       |
| FS                | 0 μM Se      |               | 4.55                 | 3.06                                      | 1.39                                        | 27.9                                  | 2.74 b                              | 932.1                            | 180.1                       |
|                   | 13 μM Se     |               | 4.72                 | 3.20                                      | 1.46                                        | 31.6                                  | 4.03 a                              | 950.0                            | 171.8                       |
| AE                | 0 μM Se      |               | 3.75                 | 3.14                                      | 1.38                                        | 29.3                                  | 2.50 b                              | 891.9                            | 162.1                       |
|                   | 13 μM Se     |               | 3.40                 | 3.12                                      | 1.32                                        | 28.9                                  | 2.80 b                              | 929.2                            | 155.8                       |
| 0 μM I            | 0 μM Se      |               | 4.38                 | 3.08                                      | 1.33                                        | 28.2                                  | 2.55                                | 882.1                            | 165.7                       |
|                   | 13 μM Se     |               | 4.07                 | 3.13                                      | 1.29                                        | 29.7                                  | 3.31                                | 945.9                            | 159.5                       |
| 5 μM I            | 0 μM Se      |               | 3.92                 | 3.11                                      | 1.44                                        | 29.0                                  | 2.69                                | 941.9                            | 176.6                       |
|                   | 13 μM Se     |               | 4.05                 | 3.18                                      | 1.48                                        | 30.8                                  | 3.52                                | 933.4                            | 168.1                       |
| Significance      |              |               |                      |                                           |                                             |                                       |                                     |                                  |                             |
| HS                |              |               | *                    | ns                                        | ns                                          | ns                                    | ***                                 | ns                               | ns                          |
| I                 |              |               | ns                   | ns                                        | ns                                          | ns                                    | ns                                  | ns                               | ns                          |
| Se                |              |               | ns                   | ns                                        | ns                                          | ns                                    | ***                                 | ns                               | ns                          |
| HS × I            |              |               | ns                   | ns                                        | ns                                          | ns                                    | ns                                  | ns                               | ns                          |
| HS × Se           |              |               | ns                   | ns                                        | ns                                          | ns                                    | ***                                 | ns                               | ns                          |
| I × Se            |              |               | ns                   | ns                                        | ns                                          | ns                                    | ns                                  | ns                               | ns                          |
| HS × I × Se       |              |               | ns                   | ns                                        | ns                                          | ns                                    | ns                                  | ns                               | ns                          |

Means ( $n = 3$ ) flanked by the same letter are not statistically different for  $P = 0.05$  after Duncan's test. Significance level: \*\*\*  $P \leq 0.001$ ; \*\*  $P \leq 0.01$ ; \*  $P \leq 0.05$ ; ns = not significant.

**Table S8.** Weight reduction, total phenol, flavonoid content, antioxidant capacity (FRAP), chlorophyll a to b ratio (chl a/chl b), total chlorophyll and carotenoid contents, measured after 4 days of storage, in leaves of lettuce grown in two different hydroponic systems with different concentrations of I and Se in the nutrient solution.

| Hydroponic system | I added (μM) | Se added (μM) | Weight reduction (%) | Total phenols (mg GAE g <sup>-1</sup> FW) | Flavonoids (mg catechin g <sup>-1</sup> FW) | FRAP (μmol Fe(II) g <sup>-1</sup> FW) | chl a/chl b (mg g <sup>-1</sup> FW) | Chls tot (mg g <sup>-1</sup> FW) | Car (mg g <sup>-1</sup> FW) |
|-------------------|--------------|---------------|----------------------|-------------------------------------------|---------------------------------------------|---------------------------------------|-------------------------------------|----------------------------------|-----------------------------|
| FS                | 0            | 0             | 6.43                 | 3.31                                      | 1.54                                        | 30.7                                  | 2.93 c                              | 896.2                            | 168.9                       |
|                   |              | 13            | 7.63                 | 3.26                                      | 1.61                                        | 30.2                                  | 5.90 a                              | 963.3                            | 167.5                       |
|                   | 5            | 0             | 6.20                 | 3.24                                      | 1.51                                        | 29.2                                  | 2.65 c                              | 901.9                            | 161.2                       |
|                   |              | 13            | 4.67                 | 3.39                                      | 1.46                                        | 31.9                                  | 2.75 c                              | 917.0                            | 168.8                       |
| A                 | 0            | 0             | 5.27                 | 2.93                                      | 1.29                                        | 27.3                                  | 2.83c                               | 909.7                            | 192.8                       |
|                   |              | 13            | 5.73                 | 3.24                                      | 1.51                                        | 30.9                                  | 3.62 bc                             | 992.4                            | 168.0                       |
|                   | 5            | 0             | 3.83                 | 3.19                                      | 1.49                                        | 28.5                                  | 2.65 c                              | 954.6                            | 167.5                       |
|                   |              | 13            | 3.70                 | 3.15                                      | 1.41                                        | 32.2                                  | 4.43 b                              | 907.6                            | 175.5                       |
| FS                |              |               | 6.23 a               | 3.30                                      | 1.53                                        | 30.5                                  | 3.56                                | 919.6                            | 166.6                       |
| AE                |              |               | 4.63 b               | 3.13                                      | 1.42                                        | 29.7                                  | 3.39                                | 941.1                            | 176.0                       |
| 0 μM I            |              |               | 6.27 a               | 3.19                                      | 1.49                                        | 29.8                                  | 3.82 a                              | 940.4                            | 174.3                       |
| 5 μM I            |              |               | 4.60 b               | 3.24                                      | 1.47                                        | 30.5                                  | 3.12 b                              | 920.3                            | 168.3                       |
| 0 μM Se           |              |               | 5.43                 | 3.17                                      | 1.46                                        | 29.0                                  | 2.77 b                              | 915.6                            | 172.6                       |
| 13 μM Se          |              |               | 5.43                 | 3.26                                      | 1.50                                        | 31.3                                  | 4.18 a                              | 945.1                            | 170.0                       |
| FS                | 0 μM I       |               | 7.03                 | 3.29                                      | 1.58                                        | 30.5                                  | 4.42 a                              | 929.8                            | 168.2                       |
|                   | 5 μM I       |               | 5.43                 | 3.32                                      | 1.49                                        | 30.6                                  | 2.70 b                              | 909.4                            | 165.0                       |
| AE                | 0 μM I       |               | 5.50                 | 3.09                                      | 1.40                                        | 29.1                                  | 3.23 ab                             | 951.1                            | 180.4                       |
|                   | 5 μM I       |               | 3.77                 | 3.17                                      | 1.45                                        | 30.4                                  | 3.54 ab                             | 931.1                            | 171.5                       |
| FS                | 0 μM Se      |               | 6.32                 | 3.27                                      | 1.53                                        | 30.0                                  | 2.79                                | 899.04                           | 165.1                       |
|                   | 13 μM Se     |               | 6.15                 | 3.33                                      | 1.54                                        | 31.1                                  | 4.33                                | 940.18                           | 168.2                       |
| AE                | 0 μM Se      |               | 4.55                 | 3.06                                      | 1.39                                        | 27.9                                  | 2.74                                | 932.14                           | 180.1                       |
|                   | 13 μM Se     |               | 4.72                 | 3.20                                      | 1.46                                        | 31.6                                  | 4.03                                | 950.01                           | 171.8                       |
| 0 μM I            | 0 μM Se      |               | 5.85                 | 3.12                                      | 1.41                                        | 29.0                                  | 2.88 b                              | 903.0                            | 180.8                       |
|                   | 13 μM Se     |               | 6.68                 | 3.25                                      | 1.56                                        | 30.6                                  | 4.76 a                              | 977.9                            | 167.7                       |
| 5 μM I            | 0 μM Se      |               | 5.02                 | 3.21                                      | 1.50                                        | 28.9                                  | 2.65 b                              | 928.2                            | 164.4                       |
|                   | 13 μM Se     |               | 4.18                 | 3.27                                      | 1.43                                        | 32.1                                  | 3.59 b                              | 912.3                            | 172.2                       |
| Significance      |              |               |                      |                                           |                                             |                                       |                                     |                                  |                             |
| HS                |              |               | *                    | ns                                        | ns                                          | ns                                    | ns                                  | ns                               | ns                          |
| I                 |              |               | *                    | ns                                        | ns                                          | ns                                    | **                                  | ns                               | ns                          |
| Se                |              |               | ns                   | ns                                        | ns                                          | ns                                    | ***                                 | ns                               | ns                          |
| HS × I            |              |               | ns                   | ns                                        | ns                                          | ns                                    | ***                                 | ns                               | ns                          |
| HS × Se           |              |               | ns                   | ns                                        | ns                                          | ns                                    | ns                                  | ns                               | ns                          |
| I × Se            |              |               | ns                   | ns                                        | ns                                          | ns                                    | *                                   | *                                | ns                          |
| HS × I × Se       |              |               | ns                   | ns                                        | ns                                          | ns                                    | ***                                 | ns                               | ns                          |

Means ( $n = 3$ ) flanked by the same letter are not statistically different for  $p = 0.05$  after Duncan's test. Significance level: \*\*\*  $p \leq 0.001$ ; \*\*  $p \leq 0.01$ ; \*  $p \leq 0.05$ ; ns = not significant.

**Table S9.** Weight reduction, total phenol, flavonoid content, antioxidant capacity (FRAP), chlorophyll a to b ratio (chl a/chl b), total chlorophyll and carotenoid contents, measured after 7 days of storage, in leaves of lettuce grown in two different hydroponic systems with different concentrations of I and Se in the nutrient solution.

| Hydroponic system | I added (μM) | Se added (μM) | Weight reduction (%) | Total phenols (mg GAE g <sup>-1</sup> FW) | Flavonoids (mg catechin g <sup>-1</sup> FW) | FRAP (μmol Fe(II) g <sup>-1</sup> FW) | chl a/chl b | Chls tot (mg g <sup>-1</sup> FW) | Car (mg g <sup>-1</sup> FW) |
|-------------------|--------------|---------------|----------------------|-------------------------------------------|---------------------------------------------|---------------------------------------|-------------|----------------------------------|-----------------------------|
| FS                | 0            | 0             | 10.43                | 3.35                                      | 1.68                                        | 33.3                                  | 2.71        | 789.0                            | 153.8                       |
|                   |              | 13            | 8.07                 | 3.15                                      | 1.64                                        | 32.3                                  | 2.78        | 947.5                            | 138.4                       |
|                   | 5            | 0             | 10.70                | 3.38                                      | 1.78                                        | 32.0                                  | 2.78        | 790.9                            | 130.3                       |
|                   |              | 13            | 10.13                | 3.42                                      | 1.58                                        | 34.1                                  | 2.47        | 735.5                            | 124.1                       |
| A                 | 0            | 0             | 9.97                 | 3.33                                      | 1.86                                        | 30.6                                  | 2.60        | 781.4                            | 146.0                       |
|                   |              | 13            | 8.43                 | 3.14                                      | 1.60                                        | 32.0                                  | 2.67        | 777.2                            | 135.0                       |
|                   | 5            | 0             | 10.50                | 3.31                                      | 1.65                                        | 30.1                                  | 2.81        | 797.0                            | 136.3                       |
|                   |              | 13            | 10.43                | 3.25                                      | 1.55                                        | 32.5                                  | 2.76        | 824.4                            | 157.3                       |
| FS                |              |               | 9.83                 | 3.33                                      | 1.67                                        | 32.9                                  | 2.69        | 815.7                            | 136.6                       |
| AE                |              |               | 9.83                 | 3.26                                      | 1.66                                        | 31.3                                  | 2.71        | 795.0                            | 143.7                       |
| 0 μM I            |              |               | 9.23                 | 3.24                                      | 1.70                                        | 32.0                                  | 2.69        | 823.8                            | 143.3                       |
| 5 μM I            |              |               | 10.44                | 3.34                                      | 1.64                                        | 32.2                                  | 2.71        | 786.9                            | 137.0                       |
| 0 μM Se           |              |               | 10.40                | 3.34                                      | 1.74                                        | 31.5                                  | 2.73        | 789.6                            | 141.6                       |
| 13 μM Se          |              |               | 9.27                 | 3.24                                      | 1.59                                        | 32.7                                  | 2.67        | 821.1                            | 138.7                       |
| FS                | 0 μM I       |               | 9.25                 | 3.25                                      | 1.66                                        | 32.8                                  | 2.75        | 868.2                            | 146.1                       |
|                   | 5 μM I       |               | 10.42                | 3.40                                      | 1.68                                        | 33.1                                  | 2.63        | 763.2                            | 127.2                       |
| AE                | 0 μM I       |               | 9.20                 | 3.24                                      | 1.73                                        | 31.3                                  | 2.63        | 779.3                            | 140.5                       |
|                   | 5 μM I       |               | 10.47                | 3.28                                      | 1.60                                        | 31.3                                  | 2.79        | 810.7                            | 146.8                       |
| FS                | 0 μM Se      |               | 10.57                | 3.37                                      | 1.73                                        | 32.6                                  | 2.75        | 789.9                            | 142.1                       |
|                   | 13 μM Se     |               | 9.10                 | 3.29                                      | 1.61                                        | 33.2                                  | 2.63        | 841.5                            | 131.2                       |
| AE                | 0 μM Se      |               | 10.23                | 3.32                                      | 1.76                                        | 30.3                                  | 2.70        | 789.2                            | 141.2                       |
|                   | 13 μM Se     |               | 9.43                 | 3.20                                      | 1.57                                        | 32.2                                  | 2.72        | 800.8                            | 146.1                       |
| 0 μM I            | 0 μM Se      |               | 10.20                | 3.34                                      | 1.77                                        | 31.9                                  | 2.65        | 785.2                            | 149.9                       |
|                   | 13 μM Se     |               | 8.25                 | 3.15                                      | 1.62                                        | 32.1                                  | 2.73        | 862.3                            | 136.7                       |
| 5 μM I            | 0 μM Se      |               | 10.60                | 3.35                                      | 1.71                                        | 31.1                                  | 2.80        | 793.9                            | 133.3                       |
|                   | 13 μM Se     |               | 10.28                | 3.33                                      | 1.56                                        | 33.3                                  | 2.62        | 779.9                            | 140.7                       |
| Significance      |              |               |                      |                                           |                                             |                                       |             |                                  |                             |
| HS                |              |               | ns                   | ns                                        | ns                                          | ns                                    | ns          | ns                               | ns                          |
| I                 |              |               | ns                   | ns                                        | ns                                          | ns                                    | ns          | ns                               | ns                          |
| Se                |              |               | ns                   | ns                                        | ns                                          | ns                                    | ns          | ns                               | ns                          |
| HS × I            |              |               | ns                   | ns                                        | ns                                          | ns                                    | *           | ns                               | ns                          |
| HS × Se           |              |               | ns                   | ns                                        | ns                                          | ns                                    | ns          | ns                               | ns                          |
| I × Se            |              |               | ns                   | ns                                        | ns                                          | ns                                    | *           | ns                               | ns                          |
| HS × I × Se       |              |               | ns                   | ns                                        | ns                                          | ns                                    | ns          | ns                               | ns                          |

Means ( $n = 3$ ) flanked by the same letter are not statistically different for  $p = 0.05$  after Duncan's test. Significance level: \*\*\*  $p \leq 0.001$ ; \*\*  $p \leq 0.01$ ; \*  $p \leq 0.05$ ; ns = not significant.

**Table S10.** Total chlorophyll, carotenoid, total phenol, flavonoid content and antioxidant capacity (FRAP) measured at harvest (T0) and after 2 (T2), 4 (T4) and 7 (T7) days of storage, in leaves of lettuce grown in floating system with different concentrations of I and Se in the nutrient solution.

| Time of storage | I added ( $\mu\text{M}$ ) | Se added ( $\mu\text{M}$ ) | Chls tot ( $\text{mg g}^{-1}$ DW) | Car ( $\text{mg g}^{-1}$ DW) | Total phenols ( $\text{mg GAE g}^{-1}$ DW) | Flavonoids ( $\text{mg catechin g}^{-1}$ DW) | FRAP ( $\mu\text{mol Fe(II) g}^{-1}$ DW) |
|-----------------|---------------------------|----------------------------|-----------------------------------|------------------------------|--------------------------------------------|----------------------------------------------|------------------------------------------|
| T0              | 0                         | 0                          | 27.79                             | 5.13                         | 76.60                                      | 31.76                                        | 680.6                                    |
|                 |                           | 13                         | 26.56                             | 4.07                         | 75.30                                      | 35.90                                        | 764.8                                    |
|                 | 5                         | 0                          | 26.82                             | 4.44                         | 74.69                                      | 35.01                                        | 687.8                                    |
| T2              | 0                         | 13                         | 27.23                             | 4.66                         | 74.78                                      | 32.02                                        | 754.1                                    |
|                 |                           | 0                          | 21.55                             | 4.57                         | 69.39                                      | 30.46                                        | 646.7                                    |
|                 | 5                         | 13                         | 23.88                             | 4.04                         | 78.06                                      | 36.25                                        | 745.4                                    |
| T4              | 0                         | 0                          | 23.12                             | 4.06                         | 77.17                                      | 36.05                                        | 691.7                                    |
|                 |                           | 13                         | 23.37                             | 4.52                         | 81.09                                      | 36.27                                        | 828.8                                    |
|                 | 5                         | 0                          | 20.98                             | 3.95                         | 77.62                                      | 35.97                                        | 719.8                                    |
| T7              | 0                         | 13                         | 22.69                             | 3.95                         | 76.85                                      | 37.96                                        | 712.0                                    |
|                 |                           | 0                          | 21.30                             | 3.81                         | 76.51                                      | 35.73                                        | 690.5                                    |
|                 | 5                         | 13                         | 23.36                             | 4.30                         | 86.55                                      | 37.22                                        | 813.8                                    |
|                 | 0                         | 0                          | 17.66                             | 3.44                         | 74.95                                      | 37.63                                        | 743.7                                    |
|                 |                           | 13                         | 22.25                             | 3.25                         | 73.93                                      | 38.68                                        | 758.1                                    |
|                 | 5                         | 0                          | 17.79                             | 2.93                         | 76.12                                      | 40.05                                        | 720.2                                    |
|                 |                           | 13                         | 17.67                             | 2.98                         | 82.13                                      | 37.92                                        | 820.5                                    |
|                 | T0                        |                            | 27.10 a                           | 4.57 a                       | 75.34                                      | 33.67                                        | 721.82                                   |
|                 | T2                        |                            | 22.98 b                           | 4.30 ab                      | 76.43                                      | 34.76                                        | 728.14                                   |
|                 | T4                        |                            | 22.08 b                           | 4.00 b                       | 79.38                                      | 36.72                                        | 734.03                                   |
|                 | T7                        |                            | 18.84 c                           | 3.15 c                       | 76.78                                      | 38.57                                        | 760.62                                   |
|                 | 0 $\mu\text{M}$ I         |                            | 22.92                             | 4.05                         | 75.34                                      | 35.58                                        | 721.4                                    |
|                 | 5 $\mu\text{M}$ I         |                            | 22.58                             | 3.96                         | 78.63                                      | 36.28                                        | 750.9                                    |
|                 | 0 $\mu\text{M}$ Se        |                            | 22.13                             | 4.04                         | 75.38                                      | 35.33                                        | 697.6 b                                  |
|                 | 13 $\mu\text{M}$ Se       |                            | 23.38                             | 3.97                         | 78.59                                      | 36.53                                        | 774.7 a                                  |
| T0              | 0 $\mu\text{M}$ I         |                            | 27.17                             | 4.60                         | 75.95                                      | 33.83                                        | 722.7                                    |
|                 | 5 $\mu\text{M}$ I         |                            | 27.02                             | 4.55                         | 74.74                                      | 33.52                                        | 720.9                                    |
| T2              | 0 $\mu\text{M}$ I         |                            | 22.71                             | 4.31                         | 73.72                                      | 33.36                                        | 696.0                                    |
|                 | 5 $\mu\text{M}$ I         |                            | 23.25                             | 4.29                         | 79.13                                      | 36.16                                        | 760.2                                    |
| T4              | 0 $\mu\text{M}$ I         |                            | 21.84                             | 3.95                         | 77.23                                      | 36.97                                        | 715.9                                    |
|                 | 5 $\mu\text{M}$ I         |                            | 22.33                             | 4.05                         | 81.53                                      | 36.48                                        | 752.1                                    |
| T7              | 0 $\mu\text{M}$ I         |                            | 19.96                             | 3.35                         | 74.44                                      | 38.15                                        | 750.9                                    |
|                 | 5 $\mu\text{M}$ I         |                            | 17.73                             | 2.96                         | 79.12                                      | 38.98                                        | 770.3                                    |
| T0              | 0 $\mu\text{M}$ Se        |                            | 27.31                             | 4.79                         | 75.65                                      | 33.39                                        | 684.2                                    |
|                 | 13 $\mu\text{M}$ Se       |                            | 26.89                             | 4.36                         | 75.04                                      | 33.96                                        | 759.5                                    |
| T2              | 0 $\mu\text{M}$ Se        |                            | 22.34                             | 4.31                         | 73.28                                      | 33.26                                        | 669.2                                    |



|                          |               |       |      |       |       |       |
|--------------------------|---------------|-------|------|-------|-------|-------|
|                          | 13 $\mu$ M Se | 23.62 | 4.28 | 79.57 | 36.26 | 787.1 |
| T4                       | 0 $\mu$ M Se  | 21.14 | 3.88 | 77.06 | 35.85 | 705.2 |
|                          | 13 $\mu$ M Se | 23.03 | 4.12 | 81.70 | 37.59 | 762.9 |
| T7                       | 0 $\mu$ M Se  | 17.73 | 3.19 | 75.54 | 38.84 | 731.9 |
|                          | 13 $\mu$ M Se | 19.96 | 3.12 | 78.03 | 38.30 | 789.3 |
|                          |               |       |      |       |       |       |
| 0 $\mu$ M I              | 0 $\mu$ M Se  | 21.99 | 4.27 | 74.64 | 33.96 | 697.7 |
|                          | 13 $\mu$ M Se | 22.26 | 3.81 | 76.12 | 36.71 | 697.6 |
| 5 $\mu$ M I              | 0 $\mu$ M Se  | 23.85 | 3.83 | 76.03 | 37.20 | 745.1 |
|                          | 13 $\mu$ M Se | 22.91 | 4.11 | 81.14 | 35.86 | 804.3 |
|                          |               |       |      |       |       |       |
| Significance             |               |       |      |       |       |       |
|                          |               |       |      |       |       |       |
| T                        |               | ***   | ***  | ns    | ns    | ns    |
| I                        |               | ns    | ns   | ns    | ns    | ns    |
| Se                       |               | ns    | ns   | ns    | ns    | **    |
| T $\times$ I             |               | ns    | ns   | ns    | ns    | ns    |
| T $\times$ Se            |               | ns    | ns   | ns    | ns    | ns    |
| I $\times$ Se            |               | ns    | ns   | ns    | ns    | ns    |
| T $\times$ I $\times$ Se |               | ns    | ns   | ns    | ns    | ns    |

Means ( $n = 3$ ) flanked by the same letter are not statistically different for  $p = 0.05$  after Duncan's test. Significance level: \*\*\*  $p \leq 0.001$ ; \*\*  $p \leq 0.01$ ; \*  $p \leq 0.05$ ; ns = not significant.

**Table S11.** Total chlorophyll, carotenoid, total phenol, flavonoid content and antioxidant capacity (FRAP) measured at harvest (T0) and after 2 (T2), 4 (T4) and 7 (T7) days of storage, in leaves of lettuce grown in aeroponics with different concentrations of I and Se in the nutrient solution.

| Time of storage | I added (μM) | Se added (μM) | Chls tot (mg g <sup>-1</sup> DW) | Car (mg g <sup>-1</sup> DW) | Total phenols (mg GAE g <sup>-1</sup> DW) | Flavonoids (mg catechin g <sup>-1</sup> DW) | FRAP (μmol Fe(II) g <sup>-1</sup> DW) |
|-----------------|--------------|---------------|----------------------------------|-----------------------------|-------------------------------------------|---------------------------------------------|---------------------------------------|
| T0              | 0            | 0             | 21.44                            | 4.14                        | 73.55                                     | 29.79                                       | 695.3                                 |
|                 |              | 13            | 25.98                            | 4.48                        | 64.77                                     | 23.90                                       | 627.5                                 |
|                 | 5            | 0             | 22.41                            | 4.18                        | 64.97                                     | 26.10                                       | 576.6                                 |
| T2              | 0            | 13            | 24.34                            | 4.26                        | 73.45                                     | 31.50                                       | 705.4                                 |
|                 |              | 0             | 19.70                            | 3.66                        | 72.84                                     | 31.69                                       | 670.2                                 |
|                 | 5            | 13            | 24.04                            | 3.89                        | 77.84                                     | 32.43                                       | 700.5                                 |
| T4              | 0            | 0             | 19.95                            | 3.55                        | 67.21                                     | 29.88                                       | 632.1                                 |
|                 |              | 13            | 22.17                            | 3.84                        | 76.81                                     | 32.85                                       | 731.4                                 |
|                 | 5            | 0             | 18.36                            | 3.29                        | 75.87                                     | 38.30                                       | 678.7                                 |
| T7              | 0            | 13            | 22.84                            | 2.65                        | 73.47                                     | 34.88                                       | 697.8                                 |
|                 |              | 0             | 17.71                            | 2.95                        | 71.04                                     | 31.62                                       | 631.5                                 |
|                 | 5            | 13            | 17.43                            | 2.93                        | 76.58                                     | 35.74                                       | 764.2                                 |
|                 | 0            | 0             | 16.92                            | 3.16                        | 72.09                                     | 40.22                                       | 661.9                                 |
|                 |              | 13            | 18.78                            | 3.26                        | 75.91                                     | 38.70                                       | 772.4                                 |
|                 | 5            | 0             | 15.85                            | 2.71                        | 65.78                                     | 32.84                                       | 599.0                                 |
|                 |              | 13            | 18.51                            | 3.53                        | 72.92                                     | 34.69                                       | 730.1                                 |
|                 | T0           |               | 23.55 a                          | 4.26 a                      | 69.18                                     | 27.82 c                                     | 651.2                                 |
|                 | T2           |               | 21.46 b                          | 3.74 ab                     | 73.68                                     | 31.71 bc                                    | 683.6                                 |
|                 | T4           |               | 19.08 c                          | 2.96 c                      | 74.24                                     | 35.13 ab                                    | 693.1                                 |
|                 | T7           |               | 17.51 c                          | 3.17 bc                     | 71.68                                     | 36.61 a                                     | 690.9                                 |
|                 | 0 μM I       |               | 21.01 a                          | 3.57                        | 73.29                                     | 33.74                                       | 688.0                                 |
|                 | 5 μM I       |               | 19.80 b                          | 3.49                        | 71.10                                     | 31.90                                       | 671.3                                 |
|                 | 0 μM Se      |               | 19.04 b                          | 3.46                        | 70.42                                     | 32.55                                       | 643.2 b                               |
|                 | 13 μM Se     |               | 21.76 a                          | 3.61                        | 73.97                                     | 33.09                                       | 716.2 a                               |
| T0              | 0 μM I       |               | 23.71                            | 4.31                        | 69.16                                     | 26.84                                       | 661.4                                 |
|                 | 5 μM I       |               | 23.38                            | 4.22                        | 69.21                                     | 28.80                                       | 641.0                                 |
| T2              | 0 μM I       |               | 21.87                            | 3.78                        | 75.34                                     | 32.06                                       | 685.4                                 |
|                 | 5 μM I       |               | 21.06                            | 3.70                        | 72.01                                     | 31.36                                       | 681.8                                 |
| T4              | 0 μM I       |               | 20.60                            | 2.97                        | 74.67                                     | 36.59                                       | 688.3                                 |
|                 | 5 μM I       |               | 17.57                            | 2.94                        | 73.81                                     | 33.68                                       | 697.9                                 |
| T7              | 0 μM I       |               | 17.85                            | 3.21                        | 74.00                                     | 39.46                                       | 717.2                                 |
|                 | 5 μM I       |               | 17.18                            | 3.12                        | 69.35                                     | 33.77                                       | 664.6                                 |
| T0              | 0 μM Se      |               | 21.93                            | 4.16                        | 69.26                                     | 27.94                                       | 635.9                                 |
|                 | 13 μM Se     |               | 25.16                            | 4.37                        | 69.11                                     | 27.70                                       | 666.4                                 |
| T2              | 0 μM Se      |               | 19.83                            | 3.61                        | 70.03                                     | 30.78                                       | 651.2                                 |
|                 | 13 μM Se     |               | 23.10                            | 3.87                        | 77.33                                     | 32.64                                       | 716.0                                 |
| T4              | 0 μM Se      |               | 18.03                            | 3.12                        | 73.46                                     | 34.96                                       | 655.1                                 |
|                 | 13 μM Se     |               | 20.14                            | 2.79                        | 75.03                                     | 35.31                                       | 731.0                                 |
| T7              | 0 μM Se      |               | 16.39                            | 2.94                        | 68.94                                     | 36.53                                       | 630.5                                 |
|                 | 13 μM Se     |               | 18.64                            | 3.40                        | 74.42                                     | 36.70                                       | 751.3                                 |
| 0 μM I          | 0 μM Se      |               | 19.11 b                          | 3.56                        | 73.59                                     | 35.00                                       | 676.5 b                               |
|                 | 13 μM Se     |               | 22.91 a                          | 3.57                        | 73.00                                     | 32.48                                       | 699.6 ab                              |

|                          |               |         |      |       |       |         |
|--------------------------|---------------|---------|------|-------|-------|---------|
| 5 $\mu$ M I              | 0 $\mu$ M Se  | 18.98 b | 3.35 | 67.25 | 30.11 | 609.8 c |
|                          | 13 $\mu$ M Se | 20.61 b | 3.64 | 74.94 | 33.69 | 732.8 a |
| Significance             |               |         |      |       |       |         |
| T                        |               | ***     | **   | ns    | ***   | ns      |
| I                        |               | *       | ns   | ns    | ns    | ns      |
| Se                       |               | ***     | ns   | ns    | ns    | ***     |
| T $\times$ I             |               | ns      | ns   | ns    | ns    | ns      |
| T $\times$ Se            |               | ns      | ns   | ns    | ns    | ns      |
| I $\times$ Se            |               | *       | ns   | ns    | *     | *       |
| T $\times$ I $\times$ Se |               | ns      | ns   | ns    | ns    | ns      |

Means ( $n = 3$ ) flanked by the same letter are not statistically different for  $p = 0.05$  after Duncan's test. Significance level: \*\*\*  $p \leq 0.001$ ; \*\*  $p \leq 0.01$ ; \*  $p \leq 0.05$ ; ns = not significant.

**Table S12.** Chlorophyll a to b ratio (chl a/chl b), total chlorophyll, carotenoid contents and weight reduction, measured at harvest (T0), after 2 (T2), 4 (T4) and 7 (T7) days of storage, in leaves of lettuce plants grown in floating system at different concentrations of I and Se in the nutrient solution.

| Time of storage   | I added ( $\mu\text{M}$ ) | Se added ( $\mu\text{M}$ ) | chl a/chl b | Chls tot ( $\text{mg g}^{-1}$ FW) | Car ( $\text{mg g}^{-1}$ FW) | Weight reduction (%) |
|-------------------|---------------------------|----------------------------|-------------|-----------------------------------|------------------------------|----------------------|
| T0                | 0                         | 0                          | 2.83 d      | 1.112                             | 0.205                        |                      |
|                   |                           | 13                         | 2.66 d      | 1.041                             | 0.160                        |                      |
|                   | 5                         | 0                          | 2.58 d      | 1.065                             | 0.176                        |                      |
|                   |                           | 13                         | 2.85 d      | 1.018                             | 0.174                        |                      |
| T2                | 0                         | 0                          | 2.83 d      | 0.910                             | 0.193                        | 5.27                 |
|                   |                           | 13                         | 3.62 c      | 0.992                             | 0.168                        | 5.73                 |
|                   | 5                         | 0                          | 2.65 d      | 0.955                             | 0.168                        | 3.83                 |
|                   |                           | 13                         | 4.43 b      | 0.908                             | 0.176                        | 3.70                 |
| T4                | 0                         | 0                          | 2.93 d      | 0.896                             | 0.169                        | 6.43                 |
|                   |                           | 13                         | 5.90 a      | 0.963                             | 0.168                        | 7.63                 |
|                   | 5                         | 0                          | 2.65 d      | 0.902                             | 0.161                        | 6.20                 |
|                   |                           | 13                         | 2.75 d      | 0.917                             | 0.169                        | 4.67                 |
| T7                | 0                         | 0                          | 2.71 d      | 0.789                             | 0.154                        | 10.43                |
|                   |                           | 13                         | 2.78 d      | 0.947                             | 0.138                        | 8.07                 |
|                   | 5                         | 0                          | 2.78 d      | 0.791                             | 0.130                        | 10.70                |
|                   |                           | 13                         | 2.47 d      | 0.735                             | 0.124                        | 10.13                |
|                   | T0                        |                            | 2.73 b      | 1.059 a                           | 0.179 a                      |                      |
|                   | T2                        |                            | 3.39 ab     | 0.941 b                           | 0.176 a                      | 4.63 c               |
|                   | T4                        |                            | 3.56 a      | 0.920 b                           | 0.167 a                      | 6.23 b               |
|                   | T7                        |                            | 2.69 b      | 0.816 c                           | 0.137 b                      | 9.83 a               |
|                   | 0 $\mu\text{M}$ I         |                            | 3.28 a      | 0.956                             | 0.169                        | 7.26                 |
|                   | 5 $\mu\text{M}$ I         |                            | 2.90 b      | 0.911                             | 0.160                        | 6.54                 |
|                   | 0 $\mu\text{M}$ Se        |                            | 2.75 b      | 0.927                             | 0.170                        | 7.14                 |
|                   | 13 $\mu\text{M}$ Se       |                            | 3.43 a      | 0.940                             | 0.159                        | 6.66                 |
| T0                | 0 $\mu\text{M}$ I         |                            | 2.75 b      | 1.076                             | 0.182                        |                      |
|                   | 5 $\mu\text{M}$ I         |                            | 2.72 b      | 1.042                             | 0.175                        |                      |
| T2                | 0 $\mu\text{M}$ I         |                            | 3.23 b      | 0.951                             | 0.180                        | 5.50                 |
|                   | 5 $\mu\text{M}$ I         |                            | 3.54 ab     | 0.931                             | 0.172                        | 3.77                 |
| T4                | 0 $\mu\text{M}$ I         |                            | 4.42 a      | 0.930                             | 0.168                        | 7.03                 |
|                   | 5 $\mu\text{M}$ I         |                            | 2.70 b      | 0.909                             | 0.165                        | 5.43                 |
| T7                | 0 $\mu\text{M}$ I         |                            | 2.75 b      | 0.868                             | 0.146                        | 9.25                 |
|                   | 5 $\mu\text{M}$ I         |                            | 2.63 b      | 0.763                             | 0.127                        | 10.42                |
| T0                | 0 $\mu\text{M}$ Se        |                            | 2.71 b      | 1.088                             | 0.191                        |                      |
|                   | 13 $\mu\text{M}$ Se       |                            | 2.76 b      | 1.030                             | 0.167                        |                      |
| T2                | 0 $\mu\text{M}$ Se        |                            | 2.74 b      | 0.932                             | 0.180                        | 4.55                 |
|                   | 13 $\mu\text{M}$ Se       |                            | 4.03 a      | 0.950                             | 0.172                        | 4.72                 |
| T4                | 0 $\mu\text{M}$ Se        |                            | 2.79 b      | 0.899                             | 0.165                        | 6.32                 |
|                   | 13 $\mu\text{M}$ Se       |                            | 4.33 a      | 0.940                             | 0.168                        | 6.15                 |
| T7                | 0 $\mu\text{M}$ Se        |                            | 2.75 b      | 0.790                             | 0.142                        | 10.57                |
|                   | 13 $\mu\text{M}$ Se       |                            | 2.63 b      | 0.841                             | 0.131                        | 9.10                 |
| 0 $\mu\text{M}$ I | 0 $\mu\text{M}$ Se        |                            | 2.83 b      | 0.927                             | 0.180                        | 7.38                 |
|                   | 13 $\mu\text{M}$ Se       |                            | 3.74 a      | 0.986                             | 0.158                        | 7.14                 |
| 5 $\mu\text{M}$ I | 0 $\mu\text{M}$ Se        |                            | 2.67 b      | 0.928                             | 0.159                        | 6.91                 |

|                          | 13 $\mu$ M Se | 3.13 ab | 0.895 | 0.161 | 6.17 |
|--------------------------|---------------|---------|-------|-------|------|
|                          | Significance  |         |       |       |      |
| T                        | ***           | ***     | **    | ***   |      |
| I                        | **            | ns      | ns    | ns    |      |
| Se                       | ***           | ns      | ns    | ns    |      |
| T $\times$ I             | ***           | ns      | ns    | ns    |      |
| T $\times$ Se            | ***           | ns      | ns    | ns    |      |
| I $\times$ Se            | *             | ns      | ns    | ns    |      |
| T $\times$ I $\times$ Se | ***           | ns      | ns    | ns    |      |

Means ( $n = 3$ ) flanked by the same letter are not statistically different for  $p = 0.05$  after Duncan's test. Significance level: \*\*\*  $p \leq 0.001$ ; \*\*  $p \leq 0.01$ ; \*  $p \leq 0.05$ ; ns = not significant.

**Table S13.** Total phenol, flavonoid content and antioxidant capacity (FRAP), measured at harvest and after 2, 4 and 7 days of storage, in leaves of lettuce plants grown in floating system at different concentrations of I and Se in the nutrient solution.

| Time of storage | I added (μM) | Se added (μM) | Total phenols (mg GAE g <sup>-1</sup> FW) | Flavonoids (mg catechin g <sup>-1</sup> FW) | FRAP (μmol Fe(II) g <sup>-1</sup> FW) |
|-----------------|--------------|---------------|-------------------------------------------|---------------------------------------------|---------------------------------------|
| T0              | 0            | 0             | 3.06                                      | 3.81                                        | 81.67                                 |
|                 |              | 13            | 2.95                                      | 4.22                                        | 89.94                                 |
|                 | 5            | 0             | 2.97                                      | 4.17                                        | 81.91                                 |
|                 |              | 13            | 2.80                                      | 3.59                                        | 84.61                                 |
| T2              | 0            | 0             | 2.93                                      | 3.86                                        | 81.93                                 |
|                 |              | 13            | 3.24                                      | 4.52                                        | 92.83                                 |
|                 | 5            | 0             | 3.19                                      | 4.46                                        | 85.64                                 |
|                 |              | 13            | 3.15                                      | 4.22                                        | 96.59                                 |
| T4              | 0            | 0             | 3.31                                      | 4.62                                        | 92.18                                 |
|                 |              | 13            | 3.26                                      | 4.83                                        | 90.67                                 |
|                 | 5            | 0             | 3.24                                      | 4.54                                        | 87.73                                 |
|                 |              | 13            | 3.39                                      | 4.38                                        | 95.75                                 |
| T7              | 0            | 0             | 3.35                                      | 5.05                                        | 99.77                                 |
|                 |              | 13            | 3.15                                      | 4.93                                        | 96.93                                 |
|                 | 5            | 0             | 3.38                                      | 5.33                                        | 96.06                                 |
|                 |              | 13            | 3.42                                      | 4.74                                        | 102.43                                |
|                 | T0           |               | 2.94 b                                    | 1.32 b                                      | 28.18 b                               |
|                 | T2           |               | 3.13 ab                                   | 1.42 b                                      | 29.75 b                               |
|                 | T4           |               | 3.30 a                                    | 1.53 ab                                     | 30.53 ab                              |
|                 | T7           |               | 3.33 a                                    | 1.67 a                                      | 32.93 a                               |
|                 | 0 μM I       |               | 3.16                                      | 1.49                                        | 30.25                                 |
|                 | 5 μM I       |               | 3.19                                      | 1.48                                        | 30.45                                 |
|                 | 0 μM Se      |               | 3.18                                      | 1.49                                        | 29.45                                 |
|                 | 13 μM Se     |               | 3.17                                      | 1.48                                        | 31.24                                 |
| T0              | 0 μM I       |               | 3.01                                      | 1.34                                        | 28.60                                 |
|                 | 5 μM I       |               | 2.88                                      | 1.29                                        | 27.75                                 |
| T2              | 0 μM I       |               | 3.09                                      | 1.40                                        | 29.13                                 |
|                 | 5 μM I       |               | 3.17                                      | 1.45                                        | 30.37                                 |
| T4              | 0 μM I       |               | 3.29                                      | 1.58                                        | 30.47                                 |
|                 | 5 μM I       |               | 3.32                                      | 1.49                                        | 30.58                                 |
| T7              | 0 μM I       |               | 3.25                                      | 1.66                                        | 32.78                                 |
|                 | 5 μM I       |               | 3.40                                      | 1.68                                        | 33.08                                 |
| T0              | 0 μM Se      |               | 3.01                                      | 1.33                                        | 27.26                                 |
|                 | 13 μM Se     |               | 2.87                                      | 1.30                                        | 29.09                                 |
| T2              | 0 μM Se      |               | 3.06                                      | 1.39                                        | 27.93                                 |
|                 | 13 μM Se     |               | 3.20                                      | 1.46                                        | 31.57                                 |
| T4              | 0 μM Se      |               | 3.27                                      | 1.53                                        | 29.98                                 |
|                 | 13 μM Se     |               | 3.33                                      | 1.54                                        | 31.07                                 |
| T7              | 0 μM Se      |               | 3.37                                      | 1.73                                        | 32.64                                 |
|                 | 13 μM Se     |               | 3.29                                      | 1.61                                        | 33.23                                 |
| 0 μM I          | 0 μM Se      |               | 3.16                                      | 1.44                                        | 29.63                                 |
|                 | 13 μM Se     |               | 3.15                                      | 1.54                                        | 30.86                                 |
| 5 μM I          | 0 μM Se      |               | 3.19                                      | 1.54                                        | 29.28                                 |
|                 | 13 μM Se     |               | 3.19                                      | 1.41                                        | 31.61                                 |

| Significance |    |    |    |
|--------------|----|----|----|
| T            | ** | *  | *  |
| I            | ns | ns | ns |
| Se           | ns | ns | ns |
| T × I        | ns | ns | ns |
| T × Se       | ns | ns | ns |
| I × Se       | ns | ns | ns |
| T × I × Se   | ns | ns | ns |

Means ( $n = 3$ ) flanked by the same letter are not statistically different for  $p = 0.05$  after Duncan's test. Significance level: \*\*\*  $p \leq 0.001$ ; \*\*  $p \leq 0.01$ ; \*  $p \leq 0.05$ ; ns = not significant.

**Table S14.** Chlorophyll a to b ratio (chl a/chl b), total chlorophyll, carotenoid contents and weight reduction, measured at harvest and after 2, 4 and 7 days of storage, in leaves of lettuce grown in aeroponics at different concentrations of I and Se in the nutrient solution.

| Hydroponic system | I added ( $\mu\text{M}$ ) | Se added ( $\mu\text{M}$ ) | chl a/chl b | Chls tot ( $\text{mg g}^{-1}$ FW) | Car ( $\text{mg g}^{-1}$ FW) | Weight reduction (%) |
|-------------------|---------------------------|----------------------------|-------------|-----------------------------------|------------------------------|----------------------|
| T0                | 0                         | 0                          | 2.87 bc     | 0.892                             | 0.172                        |                      |
|                   |                           | 13                         | 2.89 b      | 0.985                             | 0.170                        |                      |
|                   | 5                         | 0                          | 2.87 bc     | 1.009                             | 0.188                        |                      |
|                   |                           | 13                         | 3.22 a      | 0.971                             | 0.170                        |                      |
| T2                | 0                         | 0                          | 2.42 d      | 0.852                             | 0.158                        | 3.77                 |
|                   |                           | 13                         | 2.77 bc     | 0.938                             | 0.152                        | 2.83                 |
|                   | 5                         | 0                          | 2.58 cd     | 0.932                             | 0.166                        | 3.73                 |
|                   |                           | 13                         | 2.84 bc     | 0.921                             | 0.160                        | 3.97                 |
| T4                | 0                         | 0                          | 2.80 bc     | 0.804                             | 0.144                        | 5.03                 |
|                   |                           | 13                         | 1.60 e      | 0.909                             | 0.105                        | 4.83                 |
|                   | 5                         | 0                          | 2.69 bcd    | 0.830                             | 0.138                        | 4.07                 |
|                   |                           | 13                         | 2.47 d      | 0.734                             | 0.124                        | 5.23                 |
| T7                | 0                         | 0                          | 2.60 cd     | 0.781                             | 0.146                        | 9.97                 |
|                   |                           | 13                         | 2.67 bcd    | 0.777                             | 0.135                        | 8.43                 |
|                   | 5                         | 0                          | 2.81 bc     | 0.797                             | 0.136                        | 10.50                |
|                   |                           | 13                         | 2.76 bc     | 0.824                             | 0.157                        | 10.43                |
|                   | T0                        |                            | 2.96 a      | 0.964 a                           | 0.175 a                      |                      |
|                   | T2                        |                            | 2.65 b      | 0.911 a                           | 0.159 ab                     | 3.58 c               |
|                   | T4                        |                            | 2.39 c      | 0.819 b                           | 0.128 c                      | 4.79 b               |
|                   | T7                        |                            | 2.71 ab     | 0.795 b                           | 0.144 bc                     | 9.83 a               |
|                   | 0 $\mu\text{M}$ I         |                            | 2.58 b      | 0.867                             | 0.148                        | 5.81                 |
|                   | 5 $\mu\text{M}$ I         |                            | 2.78 a      | 0.877                             | 0.155                        | 6.32                 |
|                   | 0 $\mu\text{M}$ Se        |                            | 2.70        | 0.862                             | 0.156                        | 6.18                 |
|                   | 13 $\mu\text{M}$ Se       |                            | 2.65        | 0.882                             | 0.147                        | 5.96                 |
| T0                | 0 $\mu\text{M}$ I         |                            | 2.88        | 0.938                             | 0.171                        |                      |
|                   | 5 $\mu\text{M}$ I         |                            | 3.04        | 0.990                             | 0.179                        |                      |
| T2                | 0 $\mu\text{M}$ I         |                            | 2.60        | 0.895                             | 0.155                        | 3.30                 |
|                   | 5 $\mu\text{M}$ I         |                            | 2.71        | 0.926                             | 0.163                        | 3.85                 |
| T4                | 0 $\mu\text{M}$ I         |                            | 2.20        | 0.857                             | 0.125                        | 4.93                 |
|                   | 5 $\mu\text{M}$ I         |                            | 2.58        | 0.782                             | 0.131                        | 4.65                 |
| T7                | 0 $\mu\text{M}$ I         |                            | 2.63        | 0.779                             | 0.141                        | 9.20                 |
|                   | 5 $\mu\text{M}$ I         |                            | 2.79        | 0.811                             | 0.147                        | 10.47                |
| T0                | 0 $\mu\text{M}$ Se        |                            | 2.87 ab     | 0.950                             | 0.180                        |                      |
|                   | 13 $\mu\text{M}$ Se       |                            | 3.05 a      | 0.978                             | 0.170                        |                      |
| T2                | 0 $\mu\text{M}$ Se        |                            | 2.50 c      | 0.892                             | 0.162                        | 3.75                 |
|                   | 13 $\mu\text{M}$ Se       |                            | 2.80 ab     | 0.929                             | 0.156                        | 3.40                 |
| T4                | 0 $\mu\text{M}$ Se        |                            | 2.75bc      | 0.817                             | 0.141                        | 4.55                 |
|                   | 13 $\mu\text{M}$ Se       |                            | 2.04 d      | 0.822                             | 0.114                        | 5.03                 |
| T7                | 0 $\mu\text{M}$ Se        |                            | 2.70 bc     | 0.789                             | 0.141                        | 10.23                |
|                   | 13 $\mu\text{M}$ Se       |                            | 2.72 bc     | 0.801                             | 0.146                        | 9.43                 |
| 0 $\mu\text{M}$ I | 0 $\mu\text{M}$ Se        |                            | 2.67 ab     | 0.832 b                           | 0.155                        | 6.26                 |
|                   | 13 $\mu\text{M}$ Se       |                            | 2.48 b      | 0.902 a                           | 0.140                        | 5.37                 |
| 5 $\mu\text{M}$ I | 0 $\mu\text{M}$ Se        |                            | 2.74 ab     | 0.892 ab                          | 0.157                        | 6.10                 |



|                          | 13 $\mu$ M Se | 2.82 a | 0.863 ab | 0.153 | 6.54 |
|--------------------------|---------------|--------|----------|-------|------|
|                          | Significance  |        |          |       |      |
| T                        |               | ***    | ***      | *     | ***  |
| I                        |               | ***    | ns       | ns    | ns   |
| Se                       |               | ns     | ns       | ns    | ns   |
| T $\times$ I             |               | ns     | ns       | ns    | ns   |
| T $\times$ Se            |               | ***    | ns       | ns    | ns   |
| I $\times$ Se            |               | **     | *        | ns    | ns   |
| T $\times$ I $\times$ Se |               | ***    | ns       | ns    | ns   |

Means ( $n = 3$ ) flanked by the same letter are not statistically different for  $p = 0.05$  after Duncan's test. Significance level: \*\*\*  $p \leq 0.001$ ; \*\*  $p \leq 0.01$ ; \*  $p \leq 0.05$ ; ns = not significant.

**Table S15.** Total phenol, flavonoid content and antioxidant capacity (FRAP) measured at harvest and after 2, 4 and 7 days of storage, in leaves of lettuce plants grown in aeroponics at different concentrations of I and Se in the nutrient solution.

| Hydroponic system | I added (μM) | Se added (μM) | Total phenols (mg<br>GAE g <sup>-1</sup> FW) | Flavonoids (mg<br>catechin g <sup>-1</sup> FW) | FRAP (μmol<br>Fe(II) g <sup>-1</sup> FW) |
|-------------------|--------------|---------------|----------------------------------------------|------------------------------------------------|------------------------------------------|
| T0                | 0            | 0             | 3.06                                         | 1.24                                           | 28.92                                    |
|                   |              | 13            | 2.45                                         | 0.91                                           | 23.78                                    |
|                   | 5            | 0             | 2.92                                         | 1.17                                           | 25.95                                    |
|                   |              | 13            | 2.93                                         | 1.26                                           | 28.15                                    |
| T2                | 0            | 0             | 3.15                                         | 1.37                                           | 28.97                                    |
|                   |              | 13            | 3.04                                         | 1.27                                           | 27.32                                    |
|                   | 5            | 0             | 3.14                                         | 1.39                                           | 29.54                                    |
|                   |              | 13            | 3.19                                         | 1.37                                           | 30.40                                    |
| T4                | 0            | 0             | 3.32                                         | 1.68                                           | 29.71                                    |
|                   |              | 13            | 2.92                                         | 1.39                                           | 27.76                                    |
|                   | 5            | 0             | 3.33                                         | 1.48                                           | 29.61                                    |
|                   |              | 13            | 3.22                                         | 1.50                                           | 32.20                                    |
| T7                | 0            | 0             | 3.33                                         | 1.86                                           | 30.58                                    |
|                   |              | 13            | 3.14                                         | 1.60                                           | 31.97                                    |
|                   | 5            | 0             | 3.31                                         | 1.65                                           | 30.11                                    |
|                   |              | 13            | 3.25                                         | 1.55                                           | 32.53                                    |
|                   | T0           |               | 2.84 b                                       | 1.14                                           | 26.70 b                                  |
|                   | T2           |               | 3.13 a                                       | 1.35                                           | 29.06 a                                  |
|                   | T4           |               | 3.20 a                                       | 1.51                                           | 29.82 a                                  |
|                   | T7           |               | 3.26 a                                       | 1.66                                           | 31.30 a                                  |
|                   | 0 μM I       |               | 3.05                                         | 1.41                                           | 28.63                                    |
|                   | 5 μM I       |               | 3.16                                         | 1.42                                           | 29.81                                    |
|                   | 0 μM Se      |               | 3.20 a                                       | 1.48 a                                         | 29.17                                    |
|                   | 13 μM Se     |               | 3.02 b                                       | 1.35 b                                         | 29.26                                    |
| T0                | 0 μM I       |               | 2.76                                         | 1.07                                           | 26.35                                    |
|                   | 5 μM I       |               | 2.93                                         | 1.22                                           | 27.05                                    |
| T2                | 0 μM I       |               | 3.09                                         | 1.32                                           | 28.15                                    |
|                   | 5 μM I       |               | 3.16                                         | 1.38                                           | 29.97                                    |
| T4                | 0 μM I       |               | 3.12                                         | 1.53                                           | 28.74                                    |
|                   | 5 μM I       |               | 3.28                                         | 1.49                                           | 30.90                                    |
| T7                | 0 μM I       |               | 3.24                                         | 1.73                                           | 31.27                                    |
|                   | 5 μM I       |               | 3.28                                         | 1.60                                           | 31.32                                    |
| T0                | 0 μM Se      |               | 2.99                                         | 1.21                                           | 27.43                                    |
|                   | 13 μM Se     |               | 2.69                                         | 1.08                                           | 25.96                                    |
| T2                | 0 μM Se      |               | 3.14                                         | 1.38                                           | 29.26                                    |
|                   | 13 μM Se     |               | 3.12                                         | 1.32                                           | 28.86                                    |
| T4                | 0 μM Se      |               | 3.33                                         | 1.58                                           | 29.66                                    |
|                   | 13 μM Se     |               | 3.07                                         | 1.44                                           | 29.98                                    |
| T7                | 0 μM Se      |               | 3.32                                         | 1.76                                           | 30.35                                    |
|                   | 13 μM Se     |               | 3.20                                         | 1.57                                           | 32.25                                    |
| 0 μM I            | 0 μM Se      |               | 3.22                                         | 1.54 a                                         | 29.55 ab                                 |
|                   | 13 μM Se     |               | 2.89                                         | 1.29 b                                         | 27.71 b                                  |
| 5 μM I            | 0 μM Se      |               | 3.17                                         | 1.43 ab                                        | 28.80 ab                                 |
|                   | 13 μM Se     |               | 3.15                                         | 1.42 ab                                        | 30.82 a                                  |

| Significance |    |     |    |
|--------------|----|-----|----|
| T            | ** | *** | ** |
| I            | ns | ns  | ns |
| Se           | *  | *   | ns |
| T × I        | ns | ns  | ns |
| T × Se       | ns | ns  | ns |
| I × Se       | ns | *   | *  |
| T × I × Se   | ns | ns  | ns |

Means ( $n = 3$ ) flanked by the same letter are not statistically different for  $p = 0.05$  after Duncan's test. Significance level: \*\*\*  $p \leq 0.001$ ; \*\*  $p \leq 0.01$ ; \*  $p \leq 0.05$ ; ns = not significant.

**Table S16.** Weight loss during post-harvest: results of four-way ANOVA with hydroponic system (HS), selenium (Se), idione (I) and time during post-harvest (T).

|           | Df | Sum Sq  | Mean Sq  | F value | Pr(>F)               |     |
|-----------|----|---------|----------|---------|----------------------|-----|
| HS        | 1  | 0.00125 | 0.00125  | 4.973   | 0.0305               | *   |
| Se        | 1  | 0.00023 | 0.000228 | 0.905   | 0.3461               |     |
| I         | 1  | 0.00002 | 0.00002  | 0.08    | 0.7788               |     |
| T         | 2  | 0.04278 | 0.021391 | 85.099  | $<2 \times 10^{-16}$ | *** |
| HS:Se     | 1  | 0.00003 | 0.000032 | 0.127   | 0.7228               |     |
| HS:I      | 1  | 0.00068 | 0.000684 | 2.723   | 0.1054               |     |
| HS:T      | 2  | 0.00067 | 0.000335 | 1.331   | 0.2738               |     |
| Se:I      | 1  | 0.00008 | 0.000076 | 0.303   | 0.5848               |     |
| Se:T      | 2  | 0.00056 | 0.000282 | 1.12    | 0.3346               |     |
| I:T       | 2  | 0.00161 | 0.000805 | 3.203   | 0.0495               | *   |
| HS:Se:I   | 1  | 0.00038 | 0.000383 | 1.523   | 0.2232               |     |
| Se:I:T    | 2  | 0.00041 | 0.000203 | 0.808   | 0.4517               |     |
| HS:I:T    | 2  | 0.00036 | 0.00018  | 0.714   | 0.4947               |     |
| HS:Se:T   | 2  | 0.00014 | 0.000069 | 0.275   | 0.761                |     |
| HS:Se:I:T | 2  | 0.00037 | 0.000184 | 0.734   | 0.4854               |     |
| Residuals | 48 | 0.01207 | 0.000251 |         |                      |     |

Significance level: \*\*\*  $p \leq 0.001$ ; \*\*  $p \leq 0.01$ ; \*  $p \leq 0.05$ ; ns = not significant.

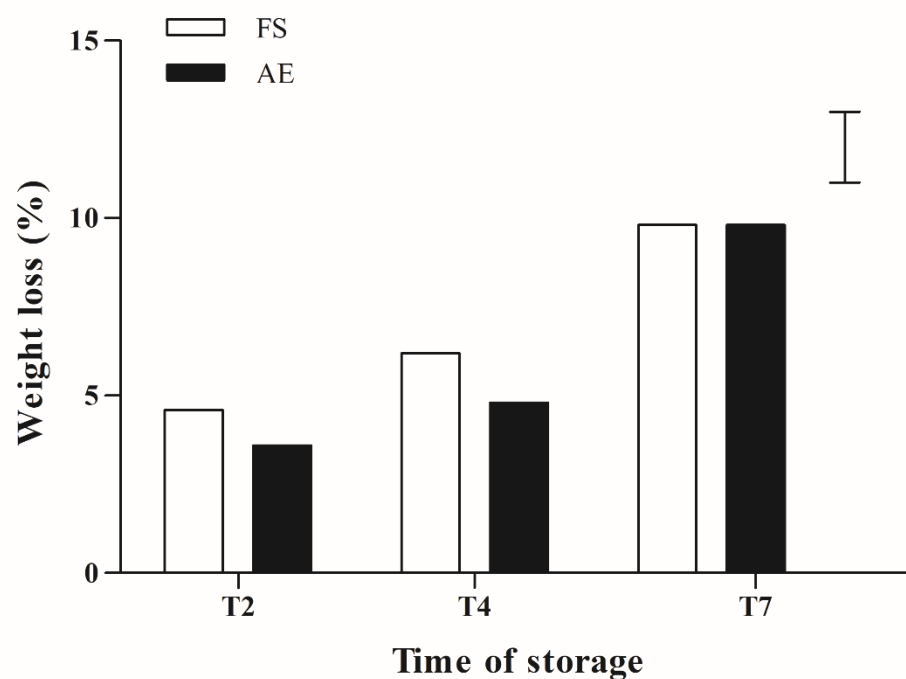

**Figure S1.** Average value of weight loss after 2 (T2), 4 (T4) and 7 (T7) days of storage in leaves of lettuce plants grown in floating system (FS) and aeroponics (AE) at different concentrations of I (0 and 5  $\mu$ M) and Se (0 and 13  $\mu$ M) in the nutrient solution, in the second experiment. Bar indicates LSD value.
